# Supplementary material for: Reviews and syntheses: Bioturbation impacts on sediment accretion and erosion in tidal marshes, with implications for carbon burial and sequestration
Source: Copernicus journal article supplement (doi:10.5194/egusphere-2025-4749), 2025-10-06
Supplement: Supplementary file 1 [file egusphere-2025-4749-supplement.pdf]

## Supplementary Material

For

### Reviews and syntheses: Bioturbation impacts on sediment accretion and erosion in tidal marshes, with implications for carbon burial and sequestration

Leigh-Ann Smit<sup>1,2\*</sup>, Janine B. Adams<sup>2,3</sup>, Gavin M. Rishworth<sup>1,2</sup>

<sup>1</sup>Department of Zoology, Nelson Mandela University, Gqeberha, South Africa

<sup>2</sup>SARChI: Shallow Water Ecosystems, Institute for Coastal and Marine Research (CMR), Nelson Mandela University, Gqeberha, South Africa

<sup>3</sup>Department of Botany, Nelson Mandela University, Gqeberha, South Africa

\*corresponding author: [s217268250@mandela.ac.za](mailto:s217268250@mandela.ac.za)

## Supplementary Material

**Table S1: Synthesis of literature on bioturbation studies as they relate to sediment accretion and carbon sequestration in tidal marshes**

| Bioturbator Assemblage                            | Habitat/Region               | Species                                                       | Aim of study                                                                                             | Methodology                                                                                           | Main finding                                                                           | Directional effect | Reference               |
|---------------------------------------------------|------------------------------|---------------------------------------------------------------|----------------------------------------------------------------------------------------------------------|-------------------------------------------------------------------------------------------------------|----------------------------------------------------------------------------------------|--------------------|-------------------------|
| <b>Process: Sediment erosion and/or accretion</b> |                              |                                                               |                                                                                                          |                                                                                                       |                                                                                        |                    |                         |
| Infauna                                           | Intertidal mudflat           | <i>Nereis diversicolor</i> ,<br>Oligochaete<br>&<br>Meiofauna | Investigate how the activities of infauna destabilize intertidal sediment                                | Experimentally reduced the density of infauna by spraying insecticide on the sediment                 | A decrease in macrofaunal densities resulted in an increase in sediment stability      | Negative           | De Deckere et al., 2001 |
| Nematode (lugworm)                                | Sandflats in intertidal zone | <i>Arenicola marina</i>                                       | Investigate how the ecological role of lungworms is influenced by increased mud sedimentation            | Lungworm and siltation regimes were manipulated in a field experiment                                 | The main ecosystem effect of the lungworm is hydraulic destabilization of the sediment | Negative           | Montserrat et al., 2011 |
| Crustacean (crab)                                 | Salt marsh                   | <i>Sesarma reticulatum</i>                                    | Analyse the ecophysical feedbacks from crab burrowing on geotechnical and geochemical properties of soil | Measured biogeochemical properties of soil (redox potential, pH, belowground biomass, shear strength) | Bioturbation significantly changes biogeochemical properties of soil                   | Negative           | Wilson et al., 2012     |

| Bioturbator Assemblage                   | Habitat/Region                                  | Species                                                  | Aim of study                                                                                                   | Methodology                                                                       | Main finding                                                                                                          | Directional effect                                     | Reference            |
|------------------------------------------|-------------------------------------------------|----------------------------------------------------------|----------------------------------------------------------------------------------------------------------------|-----------------------------------------------------------------------------------|-----------------------------------------------------------------------------------------------------------------------|--------------------------------------------------------|----------------------|
| Bivalve mollusc (cockle)                 | Mesocosm set up in a laboratory                 | <i>Cerastoderma edule</i>                                | Assess the influence of bioturbators on sediment stability                                                     | Canal flume experiment                                                            | Cockles promote the erosion of surface sediment. The destabilizing effect increases with increased density            | Negative                                               | Dairain et al., 2020 |
| Crustacean (crab)                        | Flume tank in a laboratory                      | <i>Sesarma reticulatum</i> & <i>Uca pugnax</i>           | Examine the effects of burrowing on sediment surface roughness and erodibility                                 | Laboratory flume experiment                                                       | Burrowing and feeding activities increase surface roughness and decrease the shear stress needed for sediment erosion | Negative                                               | Farron et al., 2020  |
| Bivalve mollusc (clam) & Polychaete worm | Intertidal mudflat                              | <i>Scrobicularia plana</i> & <i>Hediste diversicolor</i> | Investigate the effect of bioturbators on sediment properties, microbial dynamics and biogeochemical variables | Field manipulation experiments were run where bioturbator abundances were altered | <i>S. plana</i> enhanced erosion processes while <i>H. diversicolor</i> favoured sediment accretion                   | Positive and negative depending on species             | Morelle et al., 2024 |
| Crustacean (crab)                        | Intertidal marsh, tidal creeks and open mudflat | <i>Neohelice granulata</i>                               | Investigate how burrowing influences sediment dynamics in different                                            | Field surveys & burrow mimics                                                     | <i>N. granulata</i> promoting the trapping of sediment in open mudflats and internal                                  | Positive & Negative depending on the salt marsh region | Escapa et al., 2008  |

| Bioturbator Assemblage               | Habitat/Region          | Species                  | Aim of study                                                                    | Methodology                         | Main finding                                                                                                                              | Directional effect  | Reference            |
|--------------------------------------|-------------------------|--------------------------|---------------------------------------------------------------------------------|-------------------------------------|-------------------------------------------------------------------------------------------------------------------------------------------|---------------------|----------------------|
|                                      |                         |                          | intertidal habitats                                                             |                                     | saltmarsh, whereas in the saltmarsh edge, they were increasing sediment removal                                                           |                     |                      |
| Bivalve mollusc (mussel)             | Salt marsh              | <i>Geukensia demissa</i> | Quantify the effect of mussels on salt marsh accretion                          | Field surveys and field experiments | <i>G. demissa</i> contributes to vertical accretion in salt marshes, thus contributing to the sediment budget                             | Positive            | Crotty et al., 2023  |
| Crustacean (crab)                    | Mangrove and salt marsh | /                        | Analyse variation in surface elevation, accretion and mangrove growth over time | Structural equation models          | Gains in surface elevation are dependent on biological factors related to frequency of bioturbation, plant cover, and species composition | Neutral to positive | Bennion et al., 2024 |
| <b>Process: Carbon sequestration</b> |                         |                          |                                                                                 |                                     |                                                                                                                                           |                     |                      |
| Crustacean (crab)                    | Salt marsh              | /                        | Measure the effect of burrowing on the production and decomposition             | Field experiment                    | Burrows enhance sediment oxygenation, which stimulates microbial activity and accelerates                                                 | Negative            | Montague, 1982       |

| Bioturbator Assemblage | Habitat/Region         | Species                                                                                                          | Aim of study                                                                                              | Methodology                                      | Main finding                                                                                                                                            | Directional effect | Reference              |
|------------------------|------------------------|------------------------------------------------------------------------------------------------------------------|-----------------------------------------------------------------------------------------------------------|--------------------------------------------------|---------------------------------------------------------------------------------------------------------------------------------------------------------|--------------------|------------------------|
|                        |                        |                                                                                                                  | of organic carbon                                                                                         |                                                  | metabolic processes                                                                                                                                     |                    |                        |
| Crustacean (crab)      | Mudflat                | <i>Chasmagnathus granulatus</i>                                                                                  | Examine how burrowing activities contribute to the cycling and storing of organic matter                  | Sampled crab densities and used satellite images | Burrows of <i>C. granulatus</i> act as organic matter sinks, influencing the nutrient cycling and increasing carbon sequestration                       | Positive           | Botto et al., 2006     |
| Crustacean (crab)      | Salt marsh             | <i>Chasmagnathus granulatus</i>                                                                                  | Evaluate how crab burrowing activities influence carbon availability in surface sediments of salt marshes | Field experiment using burrow mimics             | Ecosystem engineering by crabs that burrow cause a net loss of carbon concentration in surface sediment resulting in a decrease in the amount of carbon | Negative           | Gutiérrez et al., 2006 |
| Crustacean (crab)      | Salt marsh and mudflat | <i>Helice tridens tientsinensis</i> ,<br><i>Sesarma dehaani</i> ,<br><i>Sesarma plicata</i> & <i>Uca arcuata</i> | Assesses the combined effects of crab excavation burrow mimic trapping on the turnover of sediment and    | Field surveys                                    | Burrowing crabs enhance sediment turnover and promote the movement of carbon and nitrogen, while                                                        | Negative           | Wang et al., 2010      |

| <b>Bioturbator Assemblage</b> | <b>Habitat/Region</b>        | <b>Species</b> | <b>Aim of study</b>                                                                                                                                    | <b>Methodology</b>                                         | <b>Main finding</b>                                                                                                                                                                                                        | <b>Directional effect</b> | <b>Reference</b>       |
|-------------------------------|------------------------------|----------------|--------------------------------------------------------------------------------------------------------------------------------------------------------|------------------------------------------------------------|----------------------------------------------------------------------------------------------------------------------------------------------------------------------------------------------------------------------------|---------------------------|------------------------|
|                               |                              |                | distribution of carbon                                                                                                                                 |                                                            | decreasing soil bulk density.                                                                                                                                                                                              |                           |                        |
| Crustacean (crab)             | Creek bank habitats in marsh | /              | Examine the impact of trophic shifts on substrate stability, habitat loss, and carbon loss                                                             | Field surveys, manipulative experiments and GIS analysis   | Burrowing by crabs weakens the peat base of marshes and hinders marsh accretion, and leads to a loss of sequestered carbon                                                                                                 | Negative                  | Coverdale et al., 2014 |
| Crustacean (crab)             | Mangrove                     | /              | Investigate the effects of macrobenthos on sediment organic carbon storage                                                                             | Field surveys & radiocarbon dating                         | Burrowing crabs enhance sediment carbon storage by facilitating the burial of organic matter                                                                                                                               | Positive                  | Andreetta et al., 2014 |
| Crustacean (crab)             | Salt marsh                   | /              | Assess whether benthic metabolism, and the amount, distribution and bioavailability of organic matter in the sediment is affected by crab bioturbation | In situ experiments manipulating crab and burrow densities | The quality, distribution and bioavailability of sedimentary organic matter is changed by bioturbation. Overall benthic metabolism and flux of dissolved organic matter is enhanced and carbon storage capacity is reduced | Negative                  | Fanjul et al., 2015    |

| <b>Bioturbator Assemblage</b>       | <b>Habitat/Region</b>            | <b>Species</b>                                                   | <b>Aim of study</b>                                                                                    | <b>Methodology</b>                         | <b>Main finding</b>                                                                                                                                                                                        | <b>Directional effect</b> | <b>Reference</b>       |
|-------------------------------------|----------------------------------|------------------------------------------------------------------|--------------------------------------------------------------------------------------------------------|--------------------------------------------|------------------------------------------------------------------------------------------------------------------------------------------------------------------------------------------------------------|---------------------------|------------------------|
| Crustacean (crab) & Polychaete worm | Estuary                          | <i>Macrophthalmus japonicas</i> & <i>Perinereis aibuhitensis</i> | Quantify the effects of the mud crab and clamworm on the migration of organic carbon                   | Indoor experiment using a microcosm system | These macrobenthos accelerated the mineralization of organic matter in the sediment and promoted the release of organic carbon                                                                             | Negative                  | Nie et al., 2021       |
| Livestock                           | Salt marsh                       | /                                                                | Quantify carbon stocks and sequestration rates in grazed versus nongrazed plots                        | Field surveys                              | Grazing by livestock has a neutral to positive effect on carbon sequestration                                                                                                                              | Neutral to Positive       | Graversen et al., 2022 |
| Crustacean (crab)                   | Salt marsh, mangrove and mudflat | /                                                                | Evaluate the effect of burrowing crabs on nutrient stocks, ecosystem functions and sediment properties | Systematic meta-analysis                   | Burrowing crabs accelerate the rate of nutrient cycling, but the magnitude and direction of the effects of burrowing crabs depends on the crab superfamily, the presence of vegetation and the interaction | Positive                  | Rinehart et al., 2024  |

| <b>Bioturbator Assemblage</b> | <b>Habitat/Region</b> | <b>Species</b>             | <b>Aim of study</b>                                                              | <b>Methodology</b>               | <b>Main finding</b>                                  | <b>Directional effect</b> | <b>Reference</b>        |
|-------------------------------|-----------------------|----------------------------|----------------------------------------------------------------------------------|----------------------------------|------------------------------------------------------|---------------------------|-------------------------|
| Crustacean (crab)             | Salt marsh            | <i>Sesarma reticulatum</i> | Quantify how <i>S. reticulatum</i> influences carbon fluxes, stocks and recovery | Field surveys and remote sensing | <i>S. reticulatum</i> caused a loss in carbon stocks | Negative                  | Wittingham et al., 2024 |
